# Supplementary material for: Randomized Placebo-Controlled Phase II Trial of Autologous Mesenchymal Stem Cells in Multiple Sclerosis
Source: PLoS One. 2014 Dec 1;9(12):e113936. doi: 10.1371/journal.pone.0113936 (PMC4250058; doi:10.1371/journal.pone.0113936)
Supplement: Database S1 — Main clinical trial database. (XLS) [file pone.0113936.s006.xls]

## Sheet: CMM_análisis TFS_24dic13
VAR00002	Dis_duration	Grupo_tto	Studycode	ID	NHC	MS	Age_entry	Gender	Ethnic	Family_History	DateEntry	DateEndStudy	Withdrawal	DateonsetMS	Difonset_entry	Date_2ndrelapse	yEDSS3	yEDSS4	yEDSS6	SPprogrYN	MSSSentry	Lastrelapse	Totalrelapses	Relapses_2lasty	Relapse_lastyear	ARRentry	ARRend	BOC	@1EDSSlastyear	@05EDSSlastyear	Relap_last18mYN	GdpositiveentryYN	lasttreat	Totalyearstreat	Firstline	Years1	NotesIS	Secondline	Years2	Thirdline	Years3	Fourthline	Years4	Fifthline	Years5	Sixthline	Years6	Seventhline	Years7
1	4.31507	0	CMM_EM_01	1		RR	30	woman	white caucasian	yes	2010-11-23	2011-07-01	Yes	2006-08-01	4.25	2006-09-15	3.8	3.75		no	7.65	2010-01-05	7	2	1	1.65	2	positive	yes	no	yes	yes	2010-03-08	1.7	Rebif44	0.7		natalizumab	1
2	9.3589	0	CMM_EM_02	2		RR	44	woman	white caucasian	no	2011-01-28	2012-04-18	No	2001-09-21	9.33	2002-02-15	9			no	4.17	2010-12-30	6	4	2	0.6	0.8	positive	no	yes	yes	yes	2011-01-19	8.5	ciclofosfamida		1 bolus	Copaxone	7.5	Rebif 44	1
2	12.3233	1	CMM_EM_03	3		RR	43	man	white caucasian	no	2011-02-07	2012-04-11	No	1998-10-15	12.5	1999-04-15	10	12		no	4.63	2010-09-15	19	3	3	1.5	1.6	not done	no	yes	yes	yes	2011-02-07	11.8	Betaferon	6		Betaf_Aza	1.5	Mitoxantrona	2	Copaxone	2.3
2	4.66301	1	CMM_EM_04	4		RR	41	man	white caucasian	no	2011-03-01	2012-04-23	No	2006-07-03	4.67	2007-02-06	4.2			no	6.78	2010-09-20	5	2	1	1.1	0.9	positive	yes	no	yes	yes	2011-02-15	2.9	Copaxone	2.9
2	8.91507	0	CMM_EM_05	5		RR	48	woman	white caucasian	no	2011-04-12	2012-06-12	No	2002-05-15	9.08	2004-04-15	6	6		no	6.5	2011-01-15	5	2	1	0.55	0.6	positive	yes	no	yes	no	2007-01-08	5	Betaferon	5
2	9.30137	0	CMM_EM_06	6		RR	31	woman	white caucasian	no	2011-04-19	2012-07-21	No	2002-01-01	9.25	2002-05-01	5.5			no	4.93	2011-02-01	17	5	3	1.8	1.7	negative	no	yes	yes	no	2011-01-01	7.26	Rebif44	1.5		Copaxone	1.67	Copax+IG	0.67	Co+Ig+Aza	0.75	Betaferon	0.17	Mitoxantrona	1.5	Avonex
2	8.05753	1	CMM_EM_07	7		RR	41	woman	white caucasian	no	2011-07-04	2012-09-17	No	2003-06-15	8	2004-06-15	7			no	5.36	2011-04-28	5	2	2	0.6	0.5	not done	no	yes	yes	no	2007-03-15	2.4	Rebif44	2		Copaxone	0.1	Betaferon	0.3
2	8.25205	1	CMM_EM_08	8		RR	30	woman	white caucasian	no	2011-09-07	2012-10-25		2003-06-09	7.25	2007-07-09	7.5			no	4.96	2011-06-13	4	1	1	0.5	0.4	positive	yes	no	yes	yes	2011-03-14	2.17	Betaferon	2.17
2	9.9726	1	CMM_EM_09	9		RR	23	woman	white caucasian	no	2012-03-02	2013-06-12	No	2002-03-15	10	2005-06-15	7	7.33	8	no	7.39	2011-11-03	9	1	1	0.9	0.8	not done	no	yes	yes	yes	2011-08-01	5.1	Copaxone	3		Rebif44	1.3	Natalizumab	0.8
[truncated: 205 more columns]
