# Supplementary material for: Randomized Placebo-Controlled Phase II Trial of Autologous Mesenchymal Stem Cells in Multiple Sclerosis
Source: PLoS One. 2014 Dec 1;9(12):e113936. doi: 10.1371/journal.pone.0113936 (PMC4250058; doi:10.1371/journal.pone.0113936)
Supplement: Database S3 — Magnetization transfer database. (XLS) [file pone.0113936.s008.xls]

## Sheet: MTR_NAWM_Gad_CMM
Grupo_tto	Studycode	MTR_WM_baseline	MTR_WM_3m	MTR_WM_6m	MTR_WM_9m	MTR_WM_12m	MTR_Gad_bas	MTR_Gad_3m	MTR_Gad_6m	MTR_Gad_6mnew	MTR_Gad_9m	MTR_Gad_12m	ChangeMTRGd_6m	ChangeMTRGb_placebo	ChangeMTRGd_celulas
0	CMM_EM_01	25.78	25.89	25.89		25.89	19.86	21.56	21.56				1.7	1.7
0	CMM_EM_02	26.01	25.19	25.46	25.85	25.6	18.18	14.52	14.76	16.82	22.21	22.84	-3.42	-3.42	6.02
1	CMM_EM_03	26.08	27.49	24.84	32.51	25.79	20.25	34.63	19.51				-0.74		-0.74
1	CMM_EM_04	26.86	26.47	27.22	25.75	27.26
0	CMM_EM_05	26.85	26.91	26.77	26.56	27.48	17.88	17.61	8.74	20.69	22.02	24.33	-9.14	-9.14	3.64
0	CMM_EM_06	27.26	27.96	27.91	27.75	27.85
1	CMM_EM_07	27.55	27.61	27.62	27.42	28.67
1	CMM_EM_08	27.04	27.17	26.15	26.77	26.77	26.1	24.87	23.74	22.15	16.42	16.42	-2.36	-5.73	-2.36
1	CMM_EM_09	27	26.91	27.58	26.99	26.82	22.75	23.23	24.06	21.76	23.17	23.84	1.31	2.08	1.31
